# Supplementary material for: Effect of Electrolytic Medium on the Electrochemical Reduction of Graphene Oxide on Si(111) as Probed by XPS
Source: MDPI journal article supplement (doi:10.3390/nano12010043), 2021-12-23
Supplement: s1 [file s1]

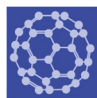

## supplementary materials

# Effect of Electrolytic Medium on the Electrochemical Reduction of Graphene Oxide on Si(111) as Probed by XPS

Andrea G. Marrani <sup>1,\*</sup>, Alessandro Motta <sup>2</sup>, Francesco Amato <sup>1</sup>, Ricardo Schrebler <sup>3</sup>, Robertino Zanoni <sup>1,\*</sup> and Enrique A. Dalchiele <sup>4</sup>

<sup>1</sup> Dipartimento di Chimica, Università di Roma La Sapienza, p.le A. Moro 5, I-00185 Rome, Italy; francesco.amato@uniroma1.it

<sup>2</sup> Dipartimento di Chimica, Università di Roma La Sapienza and Instm UdR, Roma p.le A. Moro 5, I-00185 Rome, Italy; alessandro.motta@uniroma1.it

<sup>3</sup> Instituto de Química, Facultad de Ciencias, Pontificia Universidad Católica de Valparaíso, Av. Brasil, 2950 Valparaíso, Chile; ricardo.schrebler@pucv.cl

<sup>4</sup> Instituto de Física, Facultad de Ingeniería, Universidad de la República, Julio Herrera y Reissig 565, C.C. 30, 11000 Montevideo, Uruguay; dalchiel@fing.edu.uy

\* Correspondence: andrea.marrani@uniroma1.it (A.G.M.); robertino.zanoni@uniroma1.it (R.Z.); Tel.: +39-06-4991-3316 (A.G.M.); +39-06-4991-3328 (R.Z.)

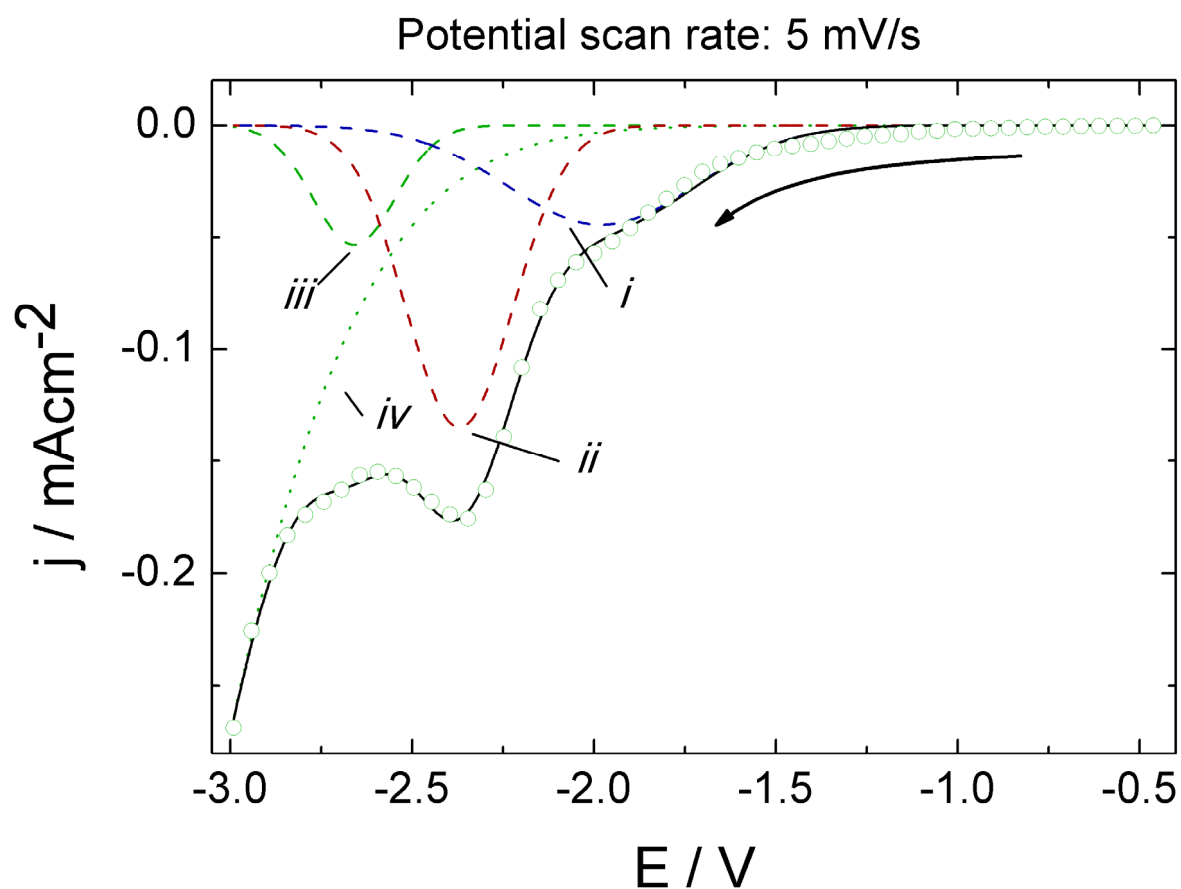

**Figure S1.** Deconvolution of cathodic wave related to the electrochemical reduction of a GO-coated silicon electrode in 0.1 M TBAPF<sub>6</sub>/CH<sub>3</sub>CN solution at 5 mVs<sup>-1</sup> potential scan rate. The graph shows: experimental current-potential data (olive open circles), deconvolution peaks (coloured dashed lines, from *i* to *iii* as indicated) and simulated envelope voltammogram (black solid line). The solvent contribution curve *iv* is also depicted. The reference electrode was a silver wire immersed in 0.01 M AgNO<sub>3</sub>/0.1 M tetrabutylammonium perchlorate (TBAP, Sigma-Aldrich) in CH<sub>3</sub>CN (+0.544 V vs. NHE, +0.345 V vs. Ag/AgCl).

i

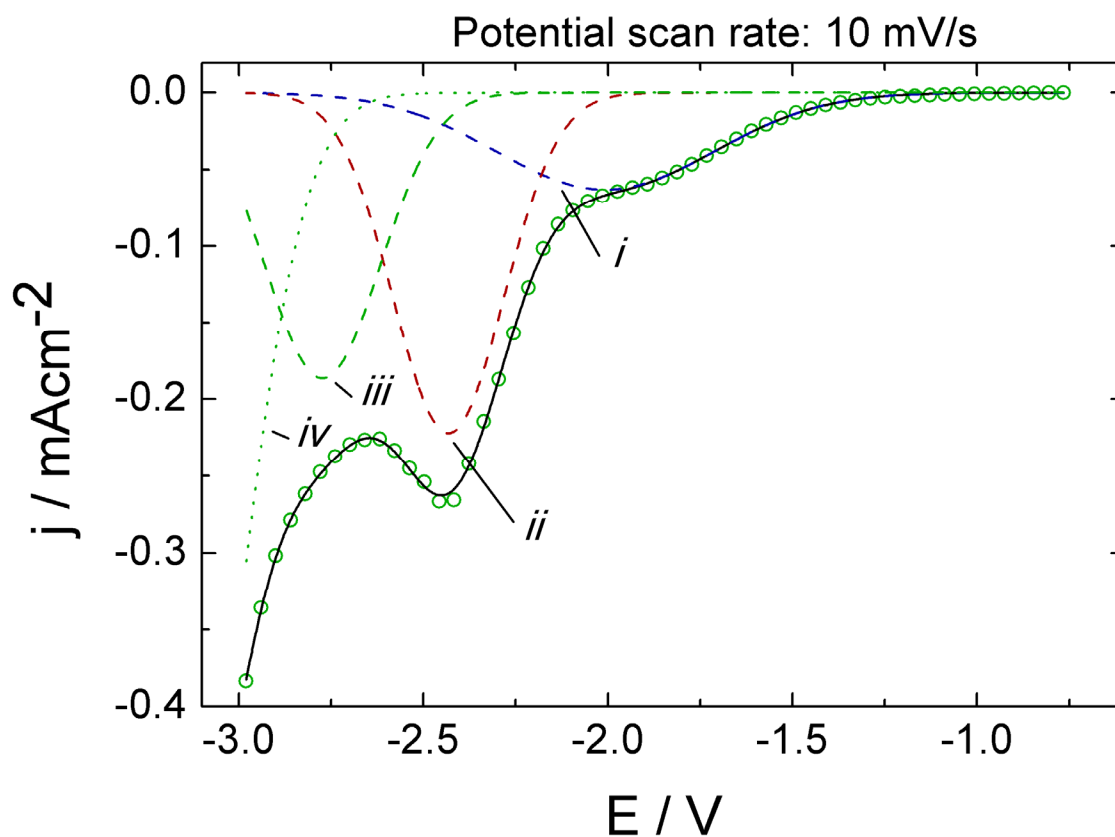

**Figure S2.** Deconvolution of cathodic wave related to the electrochemical reduction of a GO-coated silicon electrode in 0.1 M TBAPF<sub>6</sub>/CH<sub>3</sub>CN solution at 10 mVs<sup>-1</sup> potential scan rate. The graph shows: experimental current-potential data (olive open circles), deconvolution peaks (coloured dashed lines, from *i* to *iii* as indicated) and simulated envelope voltammogram (black solid line). The solvent contribution curve *iv* is also depicted. The reference electrode was a silver wire immersed in 0.01 M AgNO<sub>3</sub>/0.1 M tetrabutylammonium perchlorate (TBAP, Sigma-Aldrich) in CH<sub>3</sub>CN (+0.544 V vs. NHE, +0.345 V vs. Ag/AgCl).

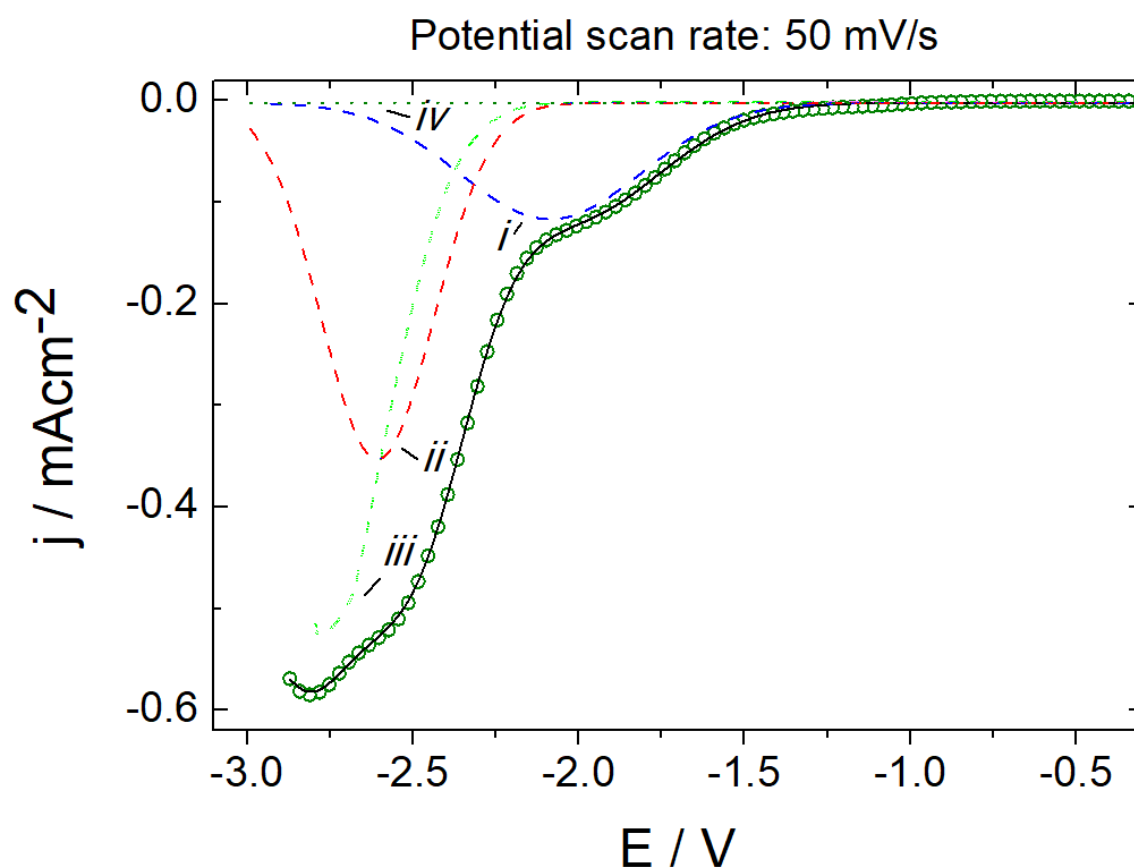

**Figure S3.** Deconvolution of cathodic wave related to the electrochemical reduction of a GO-coated silicon electrode in 0.1 M TBAPF<sub>6</sub>/CH<sub>3</sub>CN solution at 50 mVs<sup>-1</sup> potential scan rate. The graph shows: experimental current-potential data (olive open circles), deconvolution peaks (coloured dashed lines, from *i* to *iii* as indicated) and simulated envelope voltammogram (black solid line). The solvent contribution curve *iv* is also depicted. The reference electrode was a silver wire immersed in 0.01 M AgNO<sub>3</sub>/0.1 M tetrabutylammonium perchlorate (TBAP, Sigma-Aldrich) in CH<sub>3</sub>CN (+0.544 V vs. NHE, +0.345 V vs. Ag/AgCl).

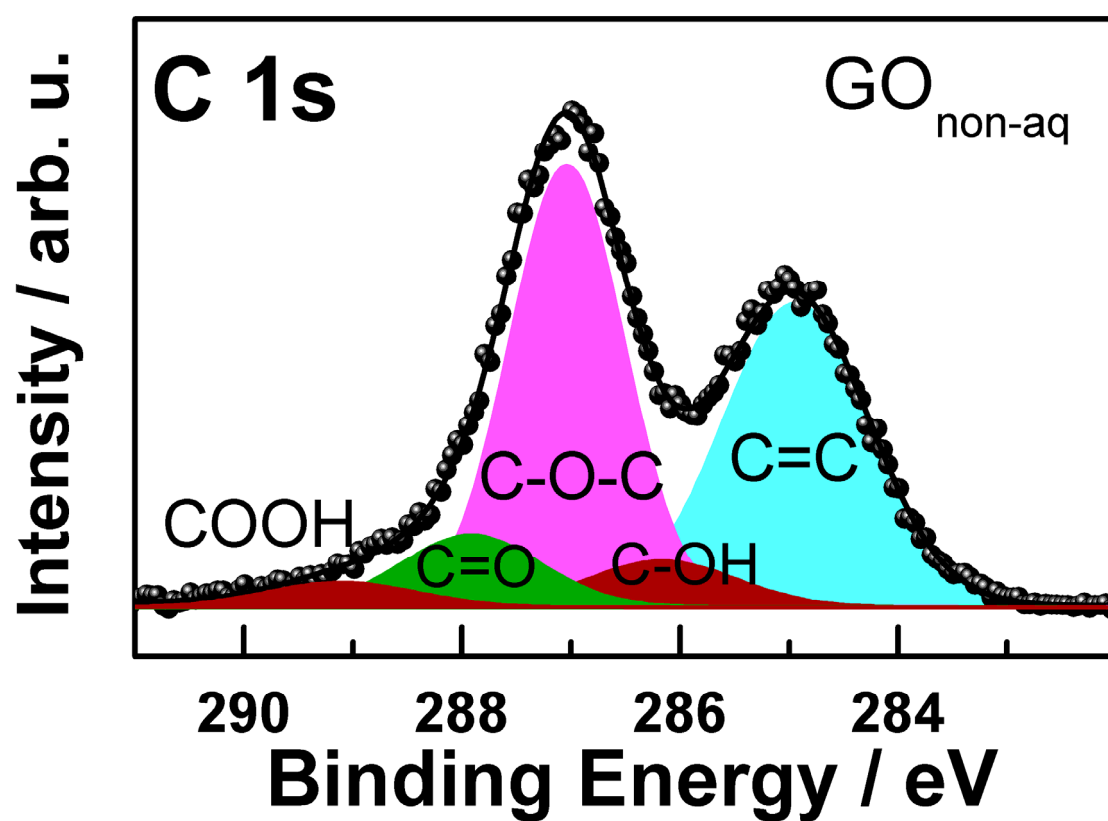

**Figure S4.** C 1s XP spectrum of pristine GO<sub>non-aq</sub> sample. Raw data are displayed with dots, while fitting reconstruction with a continuous line and color filled curves.

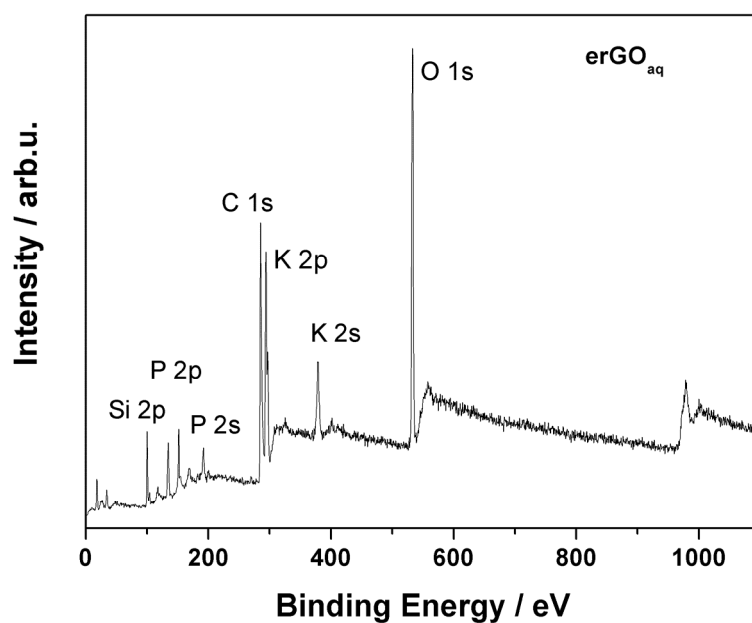

**Figure S5.** Wide XP spectrum of erGO<sub>aq</sub> sample.

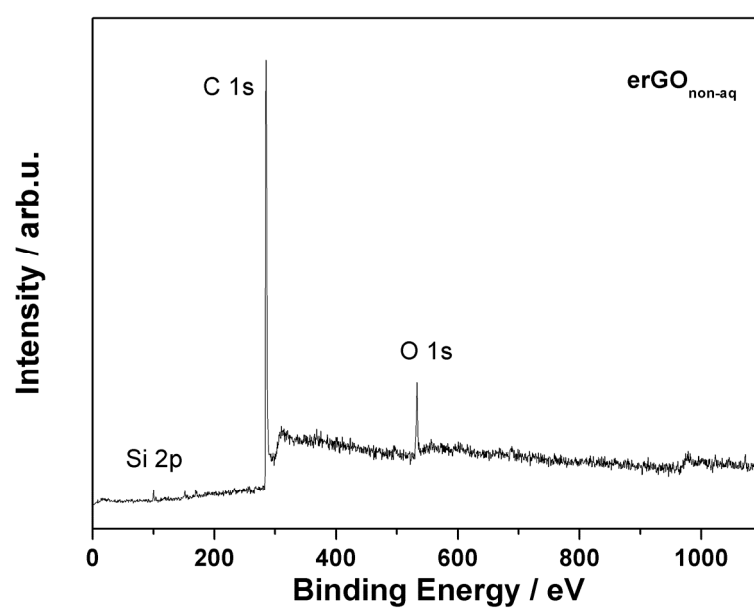

**Figure S6.** Wide XP spectrum of  $\text{erGO}_{\text{non-aq}}$  sample.

**Table S1.** Relative removal degree percentage of four different OFGs (as indicated) after the electrochemical reduction process of typical GO-coated Si electrodes in and aqueous medium (1.0 M pH=7.2 PBS buffer solution) and in a non-aqueous one (0.1 M TBAPF<sub>6</sub>/CH<sub>3</sub>CN solution). The potential scan rate was 20 mV s<sup>-1</sup> and for a whole electrochemical process of five cycles. In all cases these OFG content values were calculated from the C 1s XPS spectra.

| Sample                        | C-OH   | C-O-C | C=O  | COOH  |
|-------------------------------|--------|-------|------|-------|
| $\text{erGO}_{\text{aq}}$     | -193.0 | 84.2  | 63.7 | -71.0 |
| $\text{erGO}_{\text{non-aq}}$ | -27.0  | 83.7  | 80.6 | 74.1  |

### Oxygen/carbon atomic ratio ( $R_{O/C}$ ) calculation from XPS spectra

The oxygen-to-carbon ratio ( $R_{O/C}$ ) was calculated from the XPS data. Due to the inevitable absorption of water molecules and oxidation of H-Si, the O 1s peak includes these components besides the oxygen in GO, and hence it is not appropriate to directly use O 1s peak area to calculate  $R_{O/C}$ . Then, as proposed by Yudi Tu et al. [1,2], a semiquantitative approach has been followed. The percentages of different oxygenated groups ( $P_X$ , X refers to the different surface-bound oxygenated groups of GO) in C 1s spectra are used to calculate  $R_{O/C}$  through the following equation S1:

$$R_{O/C} = \frac{P_{C-OH} + 1/2 P_{Epoxide} + P_{C=O} + 2 P_{COOH}}{P_{C=C} + P_{C-OH} + P_{Epoxide} + P_{C=O} + P_{COOH}} \quad (S1)$$

### References

1. Tu, Y.; Utsunomiya, T.; Kokufu, S.; Soga, M.; Ichii, T.; Sugimura, H. Immobilization of Reduced Graphene Oxide on Hydrogen-Terminated Silicon Substrate as a Transparent Conductive Protector, *Langmuir* **2017**, *33*, 10765–10771.
2. Tu, Y.; Nakamoto, H.; Ichii, T.; Utsunomiya, T.; Khatri, O.P.; Sugimura, H. Fabrication of reduced graphene oxide micro patterns by vacuum-ultraviolet irradiation: From chemical and structural evolution to improving patterning precision by light collimation, *Carbon* **2017**, *119*, 82–90.
